# Supplementary material
Source: HighWire-hosted journal article supplement (https://www.g3journal.org/content/suppl/2015/12/02/g3.115.023499)
Supplement: FigureS3.pdf [file FigureS3.pdf]

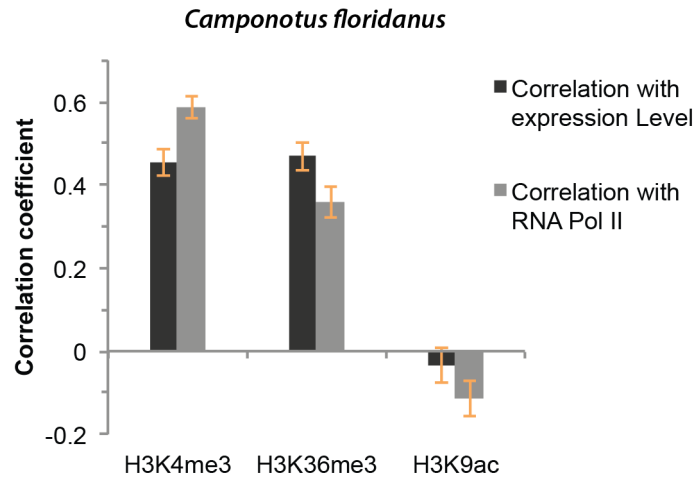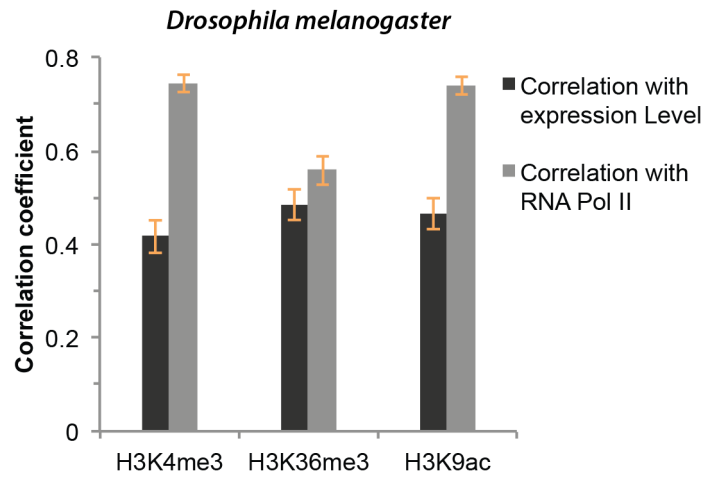

**Figure S3. Correlations between transcriptional activity and the histone modifications H3K4me3, H3K36me3, and H3K9ac.** Pearson's correlations with 95% confidence intervals are shown for data from *C. floridanus* and *D. melanogaster* (n = 2102 common ortholog groups).
